# Supplementary material
Source: Springer Nature journal article supplement (https://www.springermedizin.de/resource/supplementary/13049_2011_326_MOESM3_ESM.PDF/9666344)
Supplement: MOESM3 [file 9666344]

## The Utstein Template for documenting and reporting in physician-staffed pre-hospital services.

Defining a minimum core data set for a common European standard.

AIM: To establish a common core data set with definitions for activity documentation and shared research efforts. Core variables should be po:

| <b>Fixed system variables.</b>                                                                                                      |             |             |             |             |
|-------------------------------------------------------------------------------------------------------------------------------------|-------------|-------------|-------------|-------------|
| Definition: Variables crucial for comparisons between services and/or countries. Ask yourself: "what would I like to know if I were |             |             |             |             |
| No of expert proposal                                                                                                               | Expert no 1 | Expert no 2 | Expert no 3 | Expert no 4 |
| 12                                                                                                                                  | 10          |             | 10          | 10          |
| 5                                                                                                                                   | 6           |             |             | 6           |
| 5                                                                                                                                   | 7           |             | 9           | 7           |
| 3                                                                                                                                   | 5           | 10          | 2           | 8           |
| 5                                                                                                                                   | 8           | 5           | 5           | 9           |
| 6                                                                                                                                   | 9           | 1           |             | 4           |
| 1                                                                                                                                   |             | 8           | 3           | 5           |
| 1                                                                                                                                   |             | 6           | 4           | 1           |
| 1                                                                                                                                   | 2           |             | 6           | 3           |
| 2                                                                                                                                   |             |             |             |             |
| 1                                                                                                                                   |             |             |             |             |
| 1                                                                                                                                   |             | 9           |             |             |
| 1                                                                                                                                   |             |             |             | 2           |
| 1                                                                                                                                   |             |             | 8           |             |
| 1                                                                                                                                   |             | 6           |             |             |
| 2                                                                                                                                   | 4           |             |             |             |
| 2                                                                                                                                   | 3           | 7           |             |             |
| 1                                                                                                                                   |             |             | 7           |             |
| 1                                                                                                                                   |             |             |             |             |





|   |   |    |   |   |
|---|---|----|---|---|
| 2 |   | 5  |   |   |
| 1 | 4 |    | 1 |   |
| 2 |   |    | 3 |   |
| 1 |   | 7  |   |   |
| 2 |   | 10 |   |   |
| 1 |   |    |   | 2 |
| 2 |   |    |   |   |
| 2 |   |    | 2 |   |
| 1 |   |    |   |   |
| 1 |   |    |   |   |
| 1 |   |    |   |   |
| 1 |   |    |   |   |
| 1 |   |    |   |   |
| 2 |   |    |   |   |
| 1 |   |    |   | 1 |
| 1 |   |    |   |   |
| 1 |   |    |   |   |
| 1 |   |    |   |   |
| 1 |   |    |   |   |
| 1 |   |    |   |   |

| <b>Process mapping</b>                                                                                             |                               |                               |                               |                               |
|--------------------------------------------------------------------------------------------------------------------|-------------------------------|-------------------------------|-------------------------------|-------------------------------|
| <b>Definition: Variables related to what happened to the patient, such as treatments and procedures performed.</b> |                               |                               |                               |                               |
| <b>No of expert proposal</b>                                                                                       | <b>Your ranking from 10-1</b> | <b>Your ranking from 10-1</b> | <b>Your ranking from 10-1</b> | <b>Your ranking from 10-1</b> |
| 14                                                                                                                 | 10                            | 10                            |                               | 10                            |
| 5                                                                                                                  | 8                             | 7                             |                               | 9                             |
| 4                                                                                                                  | 6                             |                               | 6                             | 3                             |
| 7                                                                                                                  | 9                             | 8                             |                               | 8                             |
| 1                                                                                                                  |                               |                               | 9                             |                               |
| 2                                                                                                                  | 4                             | 9                             |                               |                               |
| 1                                                                                                                  |                               | 6                             | 10                            |                               |
| 4                                                                                                                  | 5                             |                               |                               | 6                             |
| 3                                                                                                                  |                               | 5                             |                               |                               |
| 2                                                                                                                  |                               |                               |                               |                               |

|   |   |   |   |   |
|---|---|---|---|---|
| 4 | 1 |   |   |   |
| 2 | 7 |   |   | 5 |
| 1 |   |   |   |   |
| 1 |   |   | 8 |   |
| 2 | 3 | 1 |   | 4 |
| 1 |   |   |   |   |
| 3 |   | 4 |   |   |
| 1 |   |   |   |   |
| 1 | 2 |   |   | 2 |
| 1 |   |   |   |   |
| 1 |   | 3 |   |   |
| 2 |   |   |   |   |
| 1 |   |   |   | 7 |
| 1 |   |   |   |   |
| 1 |   |   | 7 |   |
| 1 |   |   |   |   |
| 2 |   |   |   |   |
| 1 |   |   |   |   |
| 1 |   |   |   |   |
| 1 |   |   |   |   |
| 1 |   |   |   |   |
| 2 |   | 2 |   |   |
| 1 |   |   |   |   |
| 1 |   |   |   |   |
| 1 |   |   |   |   |
| 1 |   |   |   | 1 |
| 1 |   |   |   |   |
| 1 |   |   |   |   |

| <b>Outcome measures or Quality Indicators- Optional</b>                                                      |                               |                               |                               |                               |
|--------------------------------------------------------------------------------------------------------------|-------------------------------|-------------------------------|-------------------------------|-------------------------------|
| <b>Definition: Suggest any outcome measures or quality indicators during the pre-hospital phase of care.</b> |                               |                               |                               |                               |
| <b>No of expert proposal</b>                                                                                 | <b>Your ranking from 10-1</b> | <b>Your ranking from 10-1</b> | <b>Your ranking from 10-1</b> | <b>Your ranking from 10-1</b> |
| 4                                                                                                            | 10                            | 10                            | 9                             | 10                            |
| 1                                                                                                            | 8                             | 3                             |                               |                               |
| 2                                                                                                            | 7                             | 5                             |                               | 9                             |

|   |   |   |    |   |
|---|---|---|----|---|
| 2 |   | 1 | 10 | 8 |
| 1 | 6 | 6 |    |   |
| 2 |   | 8 |    |   |
| 2 | 5 |   |    |   |
| 3 |   | 9 |    |   |
| 1 |   |   |    |   |
| 1 | 3 |   |    | 3 |
| 1 |   |   |    | 4 |
| 1 | 9 |   |    | 5 |
| 1 |   |   | 8  |   |
| 1 | 4 | 4 |    |   |
| 1 |   | 2 |    |   |
| 1 |   |   |    | 6 |
| 1 |   |   |    | 7 |
| 1 | 1 |   |    | 2 |
| 1 |   |   |    |   |
| 1 |   | 7 |    |   |
| 1 |   |   |    |   |
| 1 |   |   |    |   |
| 1 |   |   | 7  |   |
| 1 | 2 |   |    |   |
| 1 |   |   |    |   |
| 1 |   |   |    | 1 |
| 1 |   |   |    |   |
| 1 |   |   |    |   |



ossible to collect routinely, and should be easy to adapt to most existing softwares.

| to compare my results with another service?" |             |             |             |
|----------------------------------------------|-------------|-------------|-------------|
| Expert no 5                                  | Expert no 6 | Expert no 7 | Expert no 8 |
| 6                                            | 3           | 10          | 8           |
| 9                                            | 8           | 7           | 9           |
| 7                                            |             | 9           | 7           |
| 10                                           |             | 6           | 10          |
|                                              |             |             |             |
| 1                                            | 4           | 5           |             |
| 5                                            | 7           | 8           | 1           |
| 4                                            | 10          | 4           |             |
|                                              | 9           | 3           | 4           |
| 2                                            | 6           |             |             |
| 8                                            | 5           | 1           |             |
|                                              |             |             |             |
|                                              |             |             | 1           |
|                                              |             | 6           | 2           |
|                                              | 1           |             |             |
|                                              |             | 4           |             |
|                                              |             | 3           | 6           |
|                                              |             |             |             |
| 3                                            | 2           |             |             |
|                                              |             |             |             |









|   |    |   |   |
|---|----|---|---|
|   | 2  |   |   |
|   | 6  | 4 |   |
| 6 | 10 |   | 4 |
|   |    |   |   |
| 4 |    |   | 6 |
|   |    |   |   |
|   | 7  |   | 5 |
|   |    | 3 | 3 |
|   |    |   |   |
|   |    |   |   |
|   |    |   |   |
|   |    |   |   |
|   |    | 1 |   |
|   |    |   |   |
|   |    |   |   |
|   |    |   | 1 |
|   |    |   |   |
|   |    |   |   |
|   |    |   | 2 |
|   |    |   |   |
|   |    |   |   |

|                               |                               |                               |                               |
|-------------------------------|-------------------------------|-------------------------------|-------------------------------|
|                               |                               |                               |                               |
|                               |                               |                               |                               |
| <b>Your ranking from 10-1</b> | <b>Your ranking from 10-1</b> | <b>Your ranking from 10-1</b> | <b>Your ranking from 10-1</b> |
| 10                            |                               | 1                             |                               |
| 7                             | 6                             | 8                             | 8                             |
|                               | 3                             | 9                             |                               |

|   |   |    |    |
|---|---|----|----|
| 8 |   |    | 1  |
|   |   |    | 3  |
| 9 | 2 |    | 10 |
|   | 8 |    |    |
|   | 1 |    | 9  |
|   |   |    | 5  |
|   |   | 5  |    |
|   | 5 |    |    |
|   |   |    |    |
|   |   |    |    |
|   | 7 | 10 |    |
|   |   | 7  |    |
|   |   |    | 4  |
|   | 9 |    |    |
|   |   | 4  |    |
|   |   |    | 6  |
|   |   | 6  |    |
|   |   |    | 7  |
|   |   |    |    |
|   |   |    |    |
|   | 4 |    | 2  |
|   |   | 3  |    |
|   |   | 2  |    |
|   |   |    |    |



| Expert no 9 | Expert no 10 | Expert no 11 | Expert no 12 |
|-------------|--------------|--------------|--------------|
| 9           | 1            | 10           | 8            |
| 6           |              | 9            | 10           |
| 10          | 2            |              | 9            |
| 3           | 3            |              | 2            |
| 5           | 6            |              |              |
|             |              | 1            | 7            |
| 7           |              |              |              |
| 1           |              | 2            | 4            |
|             | 5            | 7            | 1            |
|             | 7            | 8            |              |
|             | 10           |              |              |
| 4           |              |              | 6            |
|             | 9            |              |              |
|             |              |              | 5            |
|             | 8            |              |              |
|             | 4            |              |              |
|             |              |              | 3            |
| 8           |              |              |              |







|   |    |   |   |
|---|----|---|---|
|   |    |   |   |
|   | 4  |   |   |
|   | 3  |   |   |
|   |    | 3 |   |
|   |    | 1 |   |
|   |    |   | 5 |
|   | 10 |   |   |
|   | 7  |   |   |
|   |    |   | 6 |
|   | 8  |   |   |
|   |    |   | 7 |
|   |    |   |   |
|   |    |   |   |
|   |    |   |   |
| 1 |    |   |   |
|   |    |   |   |
|   |    |   |   |
|   |    |   |   |
|   |    |   |   |

|                               |                               |                               |                               |
|-------------------------------|-------------------------------|-------------------------------|-------------------------------|
|                               |                               |                               |                               |
|                               |                               |                               |                               |
| <b>Your ranking from 10-1</b> | <b>Your ranking from 10-1</b> | <b>Your ranking from 10-1</b> | <b>Your ranking from 10-1</b> |
| 10                            | 1                             | 10                            | 1                             |
| 8                             |                               |                               | 6                             |
| 1                             |                               |                               | 8                             |
| 9                             |                               |                               | 5                             |
| 2                             | 6                             |                               |                               |
|                               |                               | 9                             |                               |
| 5                             | 5                             |                               |                               |
|                               | 2                             |                               |                               |
|                               |                               |                               |                               |
|                               | 3                             |                               |                               |



|    |    |    |   |
|----|----|----|---|
|    |    |    |   |
| 4  | 7  |    | 9 |
|    |    |    |   |
| 8  | 2  |    | 3 |
|    |    | 3  |   |
|    | 8  | 7  |   |
| 1  | 10 | 6  |   |
| 7  |    |    | 5 |
|    |    |    |   |
|    |    |    | 6 |
| 2  | -5 |    |   |
|    |    | 4  | 8 |
| 10 |    |    |   |
|    |    |    | 4 |
|    | 9  |    |   |
|    | 4  | 8  |   |
|    |    | 10 |   |
| 5  |    |    |   |
|    | 3  |    |   |
|    |    | 9  |   |
|    |    |    |   |
| 3  |    | 1  |   |
|    |    |    |   |
|    |    |    |   |
|    |    |    |   |
|    |    |    | 1 |



| Expert no 13 | Expert no 14 |     | Data point                            |
|--------------|--------------|-----|---------------------------------------|
| 9            | 10           | 104 | Service Area                          |
| 7            | 5            | 82  | Population                            |
|              | 7            | 74  | Crew composition                      |
| 6            | 4            | 69  | Mission types                         |
|              |              |     |                                       |
| 10           |              | 58  | mode of transportation                |
|              | 8            | 51  | Operating hours                       |
| 2            | 2            | 45  | Activation criteria                   |
| 8            | 3            | 45  | Response time                         |
| 5            |              | 37  | Number of responses/missions per year |
|              | 6            | 35  | Service Area                          |
| 3            | 9            | 22  | Annual nb of responses                |
|              |              | 20  | Intubation rate                       |
|              | 1            | 20  | Categorization of missions            |
| 4            |              | 18  | MD-ALS unit hours per 100,000         |
|              |              | 18  | dispatch system                       |
|              |              | 17  | median response time ambulance        |
|              |              | 13  | tier response                         |
|              |              | 12  | MD-ALS unit hours (service area)      |
| 1            |              | 9   | M,W (s), Z statistic                  |

|                               |                               |    |                                                   |
|-------------------------------|-------------------------------|----|---------------------------------------------------|
|                               |                               | 7  | Percentage of physician assisted runs in relation |
|                               |                               | 7  | In-hospital training                              |
|                               |                               | 6  | Training level                                    |
|                               |                               | 6  | Type of hospitals in coverage area                |
|                               |                               | 5  | Percentage of runs aborted en route               |
|                               |                               | 3  | Rescue system                                     |
|                               |                               | 2  | Funding of service                                |
|                               |                               | 2  | distance/time to trauma center                    |
|                               |                               |    | Non MD-ALS unit hours per 100,000                 |
|                               |                               |    | fixed base                                        |
|                               |                               |    | Equipment                                         |
|                               |                               |    | Non MD-ALS unit hours (service area)              |
|                               |                               |    | experience of physician in HEMS                   |
|                               |                               |    |                                                   |
|                               |                               |    |                                                   |
|                               |                               |    |                                                   |
| <b>Your ranking from 10-1</b> | <b>Your ranking from 10-1</b> |    | <b>Data point</b>                                 |
|                               | 9                             | 83 | <b>Mission time</b>                               |
|                               | 10                            | 76 | <b>Type of dispatch</b>                           |
|                               |                               |    |                                                   |
|                               |                               |    |                                                   |
| 8                             |                               | 44 | <b>type of transportation</b>                     |
|                               | 5                             | 36 | <b>Mission outcome</b>                            |
|                               |                               |    |                                                   |
|                               |                               |    |                                                   |
| 3                             |                               | 28 | Medical                                           |
|                               |                               | 27 | type of response                                  |
|                               |                               |    |                                                   |
|                               |                               |    |                                                   |
|                               |                               |    |                                                   |
| 2                             |                               | 18 | Paediatric                                        |
|                               |                               | 13 | arrival on scene                                  |





|   |   |    |                                              |
|---|---|----|----------------------------------------------|
| 3 |   | 17 | pain assesment                               |
|   |   | 15 | cardiac arrest                               |
|   |   | 11 | GCS on arrival                               |
| 1 |   | 11 | BP(systolic)                                 |
|   |   | 11 | Respiratory Rate                             |
|   | 4 | 11 | Vital data before and after treatment        |
|   |   | 10 | Dominating type of injury                    |
|   |   | 9  | SBP on arrival                               |
|   | 2 | 8  | prehospital airway management                |
|   |   | 8  | HR categories                                |
|   |   | 7  | Survival status upon leaving patient         |
|   | 6 | 6  | condition when met compared to alarm informa |
|   |   | 4  | GCS on admission                             |
|   |   | 2  | RTS on admission                             |
|   |   | 1  | Dominatong type of medical incident          |
|   |   | 1  | AIS region(s) with score>2                   |
|   |   | 0  | In trauma: position in vehicle               |
|   |   | 0  | In medical: situation of patient             |
|   |   | 0  | social situation                             |
|   |   | 0  | Drug-abuse                                   |

|                               |                               |     |                                  |
|-------------------------------|-------------------------------|-----|----------------------------------|
|                               |                               |     |                                  |
|                               |                               |     |                                  |
| <b>Your ranking from 10-1</b> | <b>Your ranking from 10-1</b> |     | <b>Data point</b>                |
| 10                            | 9                             | 102 | Airway management                |
| 1                             |                               | 70  | Diagnostic intervention          |
| 9                             | 7                             | 68  | Medication                       |
| 2                             |                               | 55  | Surgical intervention            |
| 6                             | 10                            | 38  | immediate outcome                |
| 7                             | 6                             | 35  | ventilation                      |
|                               | 8                             | 34  | procedures                       |
|                               |                               | 31  | CPR                              |
|                               |                               | 28  | Vascular intervention            |
| 8                             | 5                             | 28  | In CA: CPR started by bystander? |

|   |   |    |                                                 |
|---|---|----|-------------------------------------------------|
|   |   | 25 | iv access                                       |
|   |   | 22 | Other intervention                              |
|   |   | 20 | Consequence: changed admittance, changed or     |
| 5 |   | 19 | late outcome                                    |
|   |   | 19 | Monitoring                                      |
|   |   | 16 | If yes: type of airway management               |
|   |   | 15 | i.o. access                                     |
|   | 1 | 13 | Diagnostic importance of physician?             |
|   | 3 | 13 | Therapeutic importance of physician             |
|   |   | 13 | Enrollment in scientific protocol               |
|   |   | 12 | Hemostasis                                      |
| 3 |   | 11 | Ventilation                                     |
|   |   | 9  | Non-invasive interventions                      |
|   |   | 9  | Immobilised                                     |
|   | 4 | 8  | trombolysis?                                    |
|   |   | 8  | Basic medical help provided by bystander?       |
|   |   | 8  | Ultrasound diagnostics                          |
|   |   | 7  | Thoracic drainage                               |
|   |   | 7  | Adjuncts                                        |
| 4 |   | 5  | IN CA: Airway secured by other EMS unit?        |
|   |   | 5  | Blood sample on scene                           |
|   | 2 | 3  | prehospital care at all                         |
|   |   | 2  | blood test on scene                             |
|   |   | 2  | If yes: could treatment have been provided by c |
|   |   | 1  | Incubator                                       |
|   |   |    | Other persons at site?                          |
|   |   |    | CPR                                             |

|                               |                               |    |                       |
|-------------------------------|-------------------------------|----|-----------------------|
|                               |                               |    |                       |
|                               |                               |    |                       |
| <b>Your ranking from 10-1</b> | <b>Your ranking from 10-1</b> |    | <b>Data point</b>     |
| 8                             | 9                             | 69 | Delta MEES            |
| 3                             | 5                             | 63 | Survival status       |
| 9                             |                               | 51 | Glasgow Outcome Scale |

|    |    |    |                                                    |
|----|----|----|----------------------------------------------------|
| 7  | 6  | 41 | Precision of dispatch code (retrospectively)       |
| 5  |    | 40 | ICU-Time                                           |
|    | 7  | 36 | Delta RTS                                          |
| 10 |    | 36 | LOS in-hospital                                    |
|    | 8  | 30 | Delta GCS                                          |
|    | 9  | 29 | EtCo2, SpO2, RR, HR, SBP before and after treat    |
|    |    | 28 | Complication                                       |
| 6  |    | 27 | VAS (visual analogue pain score) at arrival and    |
|    | 10 | 24 | HEMS benefit score                                 |
| 4  | 4  | 22 | hospital of arrival= hospital of definitive treatm |
|    |    | 22 | Discharge destination                              |
|    |    | 21 | Final diagnosis                                    |
|    |    | 20 | W statistic                                        |
|    |    | 20 | need for transport                                 |
|    | 3  | 19 | Hospital response                                  |
|    |    | 18 | HR, RF at arrival and at arrival in hospital       |
|    |    | 17 | Adherence to treatment protocols in any given p    |
| 2  |    | 13 | Abbreviated Injury Scale (AIS)                     |
|    |    | 10 | BP (MAP) at arrival and at arrival in hospital     |
|    |    | 9  | Any intended procedure not carried out             |
|    |    | 7  | first unit dispatched= highest level unit on scen  |
| 1  |    | 7  | Quality of life                                    |
|    |    | 6  | NACA upon arrival of EMS personnel at scene        |
|    |    | 4  | Validity of activation                             |
|    |    | 2  | Valid alternatives                                 |
|    |    | 1  | number of procedures before succes (above)         |

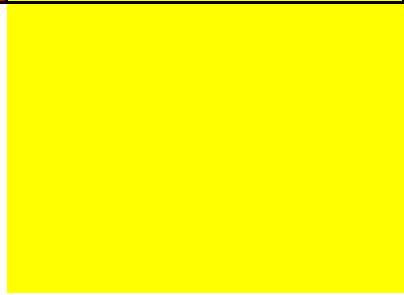





|                                                                                     |                      |
|-------------------------------------------------------------------------------------|----------------------|
| 1 to total ambulance runs                                                           | Optional             |
|                                                                                     | Core                 |
|                                                                                     | Core                 |
|                                                                                     | Optional             |
|                                                                                     | Optional             |
|                                                                                     | core                 |
|                                                                                     | core                 |
|                                                                                     | core                 |
|                                                                                     | core                 |
|                                                                                     | core                 |
|                                                                                     | Core                 |
|                                                                                     | optional             |
|                                                                                     | optional             |
|                                                                                     |                      |
|                                                                                     |                      |
| <b>Group meeting 1</b>                                                              | <b>Core/optional</b> |
| defined as data variable 32 in utstein trauma, exept replace physician and at scene | core                 |
| As defined 4 times; call dispatch- unit arrival on-scene- patient leaving scene- a  | Core                 |
|                                                                                     |                      |
|                                                                                     |                      |
| ground ambulance, helicopter, fixed-wing, other, no transportation as in no 27 u    | core                 |
| Patient attended, mission aborted weather, mission aborted technical, no need       | Core                 |
|                                                                                     |                      |
|                                                                                     |                      |
| in 49                                                                               | core                 |
| in 49                                                                               | core                 |
|                                                                                     |                      |
|                                                                                     |                      |
| <b>out outcome measures</b>                                                         | core                 |
| <b>patient characteristics</b>                                                      | core                 |

|       |          |
|-------|----------|
|       |          |
|       |          |
| in 48 | optional |
| in 48 | Core     |
|       |          |
|       |          |

|  |  |
|--|--|
|  |  |
|  |  |
|  |  |

|                                  |          |
|----------------------------------|----------|
| <b>in system characteristics</b> | optional |
|                                  |          |
|                                  |          |
|                                  |          |
|                                  |          |

|                                                                   |                      |
|-------------------------------------------------------------------|----------------------|
|                                                                   |                      |
|                                                                   |                      |
|                                                                   | <b>Core/optional</b> |
| <b>as defined in Utstein trauma</b>                               | core                 |
| as defined in Utstein trauma                                      | core                 |
|                                                                   | core                 |
| Needs to be discussed according to categorization. FHQ? Extended. | Core                 |
| out                                                               | core                 |
| first and last, raw values                                        | Core                 |
|                                                                   | core                 |
| out                                                               | Core                 |
| out                                                               | core                 |
| out                                                               | Core                 |
| out                                                               | optional             |
| out                                                               | core                 |

|                          |                      |
|--------------------------|----------------------|
| out                      | core                 |
| out                      | core                 |
| out                      | optional             |
| out                      | core                 |
| out                      | Optional             |
| out                      | optional             |
| out                      | Optional             |
| out                      | optional             |
| out                      | optional             |
| out                      | optional             |
| moves to outcome section | core                 |
| out                      | core                 |
| out                      | Optional             |
| out                      | Optional             |
| out                      | Optional             |
| out                      | optional             |
| out                      | Core                 |
| out                      | Core                 |
| out                      | core                 |
| out                      | Core                 |
|                          |                      |
|                          |                      |
|                          |                      |
|                          | <b>Core/optional</b> |
|                          | core                 |
|                          | Core                 |
|                          | Core                 |
|                          | Core                 |
|                          | Core                 |
|                          | core                 |
|                          | core                 |
|                          | core                 |
|                          | core                 |
|                          | Core                 |
|                          | Core                 |
|                          | Core                 |



|                                   |                      |
|-----------------------------------|----------------------|
|                                   | core                 |
|                                   | Core                 |
| new initiated treatment           | Core                 |
|                                   | core                 |
|                                   | core                 |
|                                   | Optional             |
|                                   | core                 |
|                                   | Core                 |
|                                   | Core                 |
|                                   | Optional             |
|                                   | Optional             |
|                                   | optional             |
|                                   | core                 |
|                                   | Optional             |
|                                   | core                 |
|                                   | Core                 |
|                                   | Optional             |
|                                   | Optional             |
|                                   | optional             |
|                                   | Core                 |
|                                   | Optional             |
|                                   | core                 |
|                                   | core                 |
| other resource within 10 minutes? | Core                 |
|                                   | Optional             |
|                                   | Core                 |
|                                   | Optional             |
|                                   |                      |
|                                   |                      |
|                                   | <b>Core/optional</b> |
|                                   |                      |

|                        |  |
|------------------------|--|
|                        |  |
|                        |  |
|                        |  |
|                        |  |
|                        |  |
| atment/management      |  |
|                        |  |
| at arrival in hospital |  |
|                        |  |
| ent                    |  |
|                        |  |
|                        |  |
|                        |  |
|                        |  |
|                        |  |
| patient                |  |
|                        |  |
|                        |  |
|                        |  |
| e                      |  |
|                        |  |
|                        |  |
|                        |  |
|                        |  |
|                        |  |



| Variable categories                                                                                                                                | Exact definition of data point                                                                                          |
|----------------------------------------------------------------------------------------------------------------------------------------------------|-------------------------------------------------------------------------------------------------------------------------|
| Predfined string: Type of education/speciality<br>Number                                                                                           | Specialist in anaesthesiology, in training for spe                                                                      |
| Predfined string: When performing ALS or other advanced effort: who is<br>trauma/internal/mix of missions, OB-GYN, newborn, interhospital transfer | HEMS Paramedic, HEMS anesthetic nurse, HEMS                                                                             |
| 1 = ground ambulance<br>2 = helicopter ambulance<br>3 = fixed-wing ambulance<br>4 = not transported<br>5 = unknown                                 | Main type of transportation vehicle (if multiple<br>chose vehicle used for the majority of the<br>transportation phase) |
| Predefined string: When is your physician-staffed service operational?<br>1 = criteria based; 2 = consultation w/ physician; 3 = both              | 24/7, all week day and evening, all week only d<br>Description of how decision of response is taken                     |
| Squared kilometres                                                                                                                                 |                                                                                                                         |
| Continuous                                                                                                                                         | Number of activated responses annually                                                                                  |
| 1 = Primary; 2 = Inter-hospital; 3 = SAR; 4 = Other                                                                                                | Categorization of different types of mission with<br>as from Unit hours ALS 'European Emergency D                       |
| alarm center/special HEMS center/                                                                                                                  |                                                                                                                         |
|                                                                                                                                                    |                                                                                                                         |
|                                                                                                                                                    | Annual unit hours of physician ALS per km2 of s                                                                         |
|                                                                                                                                                    |                                                                                                                         |

|                                                                                                                                                                                                                                    |                                                   |
|------------------------------------------------------------------------------------------------------------------------------------------------------------------------------------------------------------------------------------|---------------------------------------------------|
|                                                                                                                                                                                                                                    |                                                   |
| Number: Number of months per year                                                                                                                                                                                                  | % of full time work                               |
| Number: Number of years in pre-hospital service                                                                                                                                                                                    | Months (full time work)                           |
|                                                                                                                                                                                                                                    |                                                   |
| 1 = fixed system, 2 = Rendez-vous system<br>state/commercial/private funded                                                                                                                                                        | 1 = Physician and Paramedics use the same vel     |
|                                                                                                                                                                                                                                    |                                                   |
|                                                                                                                                                                                                                                    | as from Unit hours ALS 'European Emergency D      |
| yes/no                                                                                                                                                                                                                             |                                                   |
| Predfined string: types of equipment                                                                                                                                                                                               | Ventilator (advanced), ventilator (simple), Defib |
|                                                                                                                                                                                                                                    | as above                                          |
| yr                                                                                                                                                                                                                                 |                                                   |
|                                                                                                                                                                                                                                    |                                                   |
|                                                                                                                                                                                                                                    |                                                   |
| <b>Variable categories</b>                                                                                                                                                                                                         | <b>Exact definition of data point</b>             |
| define when does patient leave scene,                                                                                                                                                                                              |                                                   |
| Predefined string:                                                                                                                                                                                                                 | Emergency medical mission, emergency trauma       |
|                                                                                                                                                                                                                                    |                                                   |
| patient transportation                                                                                                                                                                                                             |                                                   |
| Mission: unit dispatched but no patient contact.                                                                                                                                                                                   | Operational, other higher priority mission, upda  |
|                                                                                                                                                                                                                                    |                                                   |
|                                                                                                                                                                                                                                    |                                                   |
| 1 = ACS, 2 = stroke, 3 = other cardiovascular, 4 = airway & breathing, 5 = seizure, 6 = unconsciousness, 7 = endocrino<br>( i.e. ambulatory care, transport without physicians, transport with physician, air lift, dead on scene) |                                                   |
|                                                                                                                                                                                                                                    |                                                   |
|                                                                                                                                                                                                                                    |                                                   |
|                                                                                                                                                                                                                                    |                                                   |
| 1 = airway/breathing, 2 = cardiovasc., 3 = seizure, 4 = infectious, 5 = other                                                                                                                                                      |                                                   |
|                                                                                                                                                                                                                                    |                                                   |



|                                              |                                                |
|----------------------------------------------|------------------------------------------------|
|                                              | VAS score                                      |
| 1 yes on arrival 2 yes after arrival 3 never | whether CA occurred at any time before arrival |
|                                              |                                                |
|                                              |                                                |

|                                                      |                                                  |
|------------------------------------------------------|--------------------------------------------------|
|                                                      |                                                  |
|                                                      |                                                  |
| 1 = <100, 2 = >100                                   |                                                  |
|                                                      | If pertinent (Excluding missions without any pa  |
| same/worse/better                                    |                                                  |
| Eye-, verbal- and motor-score                        | GCS on admission and/or after necessary interv   |
| Ordinal (according to Utstein Trauma Registry)       | Revised Trauma Score (RTS) categories with cli   |
|                                                      |                                                  |
| AIS regions                                          |                                                  |
| String (predfined):                                  | Driver, passenger front, backseast right, backse |
| String (predfined):                                  | Home, stairs, elevator, pavement, other outdoo   |
| (i.e. homeless, deprivation, criminal background...) |                                                  |
| String (predfined):                                  | Herione, Other opioid, Cocaine, Amphetamine, (   |

|                                                                                                                              |                                                  |
|------------------------------------------------------------------------------------------------------------------------------|--------------------------------------------------|
|                                                                                                                              |                                                  |
|                                                                                                                              |                                                  |
| <b>Variable categories</b>                                                                                                   | <b>Exact definition of data point</b>            |
| According to Utstein Airway                                                                                                  |                                                  |
| Nominal                                                                                                                      | 1 = Ultrasound; 2 = Invasive pressure monitori   |
| analg/cardiac/sedation/inotropic/etc                                                                                         | According to ATC (4th level)                     |
| Nominal                                                                                                                      | 1 = thoracostomy (incl needle-decompression);    |
| 1 dead on scene-no treatment 2 dead on scene after treatment 3 transported alive to hospital                                 |                                                  |
| spont//CPAP/hand assist/mech                                                                                                 |                                                  |
| 1 IV line 2a IV drugs 2b fibrinolysis 3 nebulization 4 bag mask ventilation 5 supraglottic device 6 intubation & ventilation |                                                  |
| Nominal                                                                                                                      | Registration according to Utstein template for c |
| Nominal                                                                                                                      | 1 = volume replacement (TBD); 2 = compressi      |
| Y/N                                                                                                                          |                                                  |

|                                                                                                              |                                                 |
|--------------------------------------------------------------------------------------------------------------|-------------------------------------------------|
|                                                                                                              |                                                 |
| Nominal                                                                                                      | 1 = CPR; 2 = defibrillation; 3 = cardioversion; |
| Y/N                                                                                                          |                                                 |
| 1 alive 2 dead                                                                                               | outcome at 30 days                              |
| 1 = BP, 2 = pulse oximetry, 3 = ECG, 4 = capnography                                                         |                                                 |
| String (predfined):                                                                                          |                                                 |
|                                                                                                              |                                                 |
| Y/N                                                                                                          |                                                 |
| Y/N                                                                                                          |                                                 |
|                                                                                                              |                                                 |
| 1 = manual BV, 2 = ventilator                                                                                |                                                 |
| 1 = iv access, 2 = io access, 3 = iv/io drug, 4 = oxygen spont. breathing, 5 = BVMV, 6 = supraglottic device |                                                 |
|                                                                                                              |                                                 |
| Y/N                                                                                                          |                                                 |
|                                                                                                              |                                                 |
| 1 = telemetric ECG-transmission                                                                              |                                                 |
| Y/N                                                                                                          |                                                 |
|                                                                                                              |                                                 |
|                                                                                                              |                                                 |
| Y/N                                                                                                          |                                                 |
|                                                                                                              |                                                 |
| Y/N                                                                                                          |                                                 |
|                                                                                                              |                                                 |

|                                                                            |                                              |
|----------------------------------------------------------------------------|----------------------------------------------|
|                                                                            |                                              |
|                                                                            |                                              |
| <b>Variable categories</b>                                                 | <b>Exact definition of data point</b>        |
| physiological scoring before and after intervention HR, RF, Pain, GCS, SBT |                                              |
| 1 = Dead; 2 = Alive; 3 = Unknown                                           | Alive or dead 30 days after event            |
| 5 = Good Recovery; 4 = Moderate disability; 3 = Severe disability; 2 =     | Glasgow Outcome Scale – at discharge from ma |



|                                                                      |                                                   |
|----------------------------------------------------------------------|---------------------------------------------------|
| 1 yes 2 no, verified higher 3 no, verified lower                     |                                                   |
| Number                                                               | days                                              |
| at arrival and at arrival in hospital                                |                                                   |
| Number                                                               | days                                              |
| worst before intervention vs. best after intervention                |                                                   |
| To be decided                                                        | Categorization of unexpected events during treat  |
| 0-8                                                                  |                                                   |
| 1 yes 2 no                                                           |                                                   |
| 1 = Home; 2 = Rehab; 3 = Morgue; 4 = Higher treatment level; 5 = And | The patient's destination after end of acute care |
| Ordinal                                                              | Diagnosis on discharge according to ICD-10 (co    |
|                                                                      | J Trauma. 2005 Jun; 58(6):1272-6; discussion 1    |
| yes/no                                                               |                                                   |
| To be decided                                                        | An categorized evaluation of the level of the rec |
|                                                                      |                                                   |
| Ordinal                                                              | AIS severity codes that reflect the injuries      |
|                                                                      |                                                   |
| 1 yes 2 no                                                           |                                                   |
| EQ-5D (and HUI)                                                      |                                                   |
| worst before intervention vs. best after intervention                |                                                   |
| To be decided                                                        | Evaluation of mission content versus activation   |
| To be decided                                                        | Categorization of equal medical alternatives giv  |
|                                                                      |                                                   |



|  |
|--|
|  |
|--|

|  |
|--|
|  |
|--|

**Comments for discussion**

Specialty in anaesthesiology, Specialist in emergency medicine, in training for speciality in emergency medicine, Specialist in surgery, in training

It is important to control all variables. The assistant is important - especially in unanticipated difficult airway management

|  |
|--|
|  |
|--|

|  |
|--|
|  |
|--|

Daytime, working days day and night, working days 24h, working days only daytime, other (specify)

|   |
|---|
| 1 |
|---|

|  |
|--|
|  |
|--|

|  |
|--|
|  |
|--|

|  |
|--|
|  |
|--|

Definition

|  |
|--|
|  |
|--|

Description of different types

Data project': Annual unit hours of ALS (physician only in this case) per 100,000 inhabitants.

|  |
|--|
|  |
|--|

To get an impression on the system  
is the doc car called out at once or later ?

service area

|  |
|--|
|  |
|--|

|  |
|--|
|  |
|--|

important to register to what degree the physicians maintain procedures with in-hospital training

|  |
|--|
|  |
|--|

|  |
|--|
|  |
|--|

|  |
|--|
|  |
|--|

nicle for patient approach

|  |
|--|
|  |
|--|

|  |
|--|
|  |
|--|

ata project': Annual unit hours of Non-ALS (physician only in this case)hours per 100,000 inhabitants.

|  |
|--|
|  |
|--|

brillator, Invasive BP-measurment tool, 12-lead ECG, 3 or 5 lead ECG, NO-inhalation equipment, Syringe-pumps (1,2,3,more), BIS, Continoi

|  |
|--|
|  |
|--|

|  |
|--|
|  |
|--|

|  |
|--|
|  |
|--|

|  |
|--|
|  |
|--|

|  |
|--|
|  |
|--|

**Comments for discussion**

|  |
|--|
|  |
|--|

a mission, Transfer of ICU patient from lower to higher level of treatment, transfer of ICU patient from higher to lower level of treatment, tra

|  |
|--|
|  |
|--|

|  |
|--|
|  |
|--|

|  |
|--|
|  |
|--|

ted infor of not required

|  |
|--|
|  |
|--|

|  |
|--|
|  |
|--|

|  |
|--|
|  |
|--|

ology, 8 = other

|  |
|--|
|  |
|--|

|  |
|--|
|  |
|--|

|  |
|--|
|  |
|--|

|  |
|--|
|  |
|--|

|  |
|--|
|  |
|--|

|  |
|--|
|  |
|--|

|  |
|--|
|  |
|--|



|                    |
|--------------------|
|                    |
| at hospital        |
|                    |
|                    |
|                    |
| See trauma utstein |
|                    |
|                    |
| tient contact)     |
|                    |

Description of sedated/intubated pts

Description of sedated/intubated pts

|  |
|--|
|  |
|  |

east left, backseast middle

r (define)

|  |
|--|
|  |
|--|

Other sentral stimulating drug, Cannabis, Benzodiazepines, Ither (define).

|                                |
|--------------------------------|
|                                |
|                                |
| <b>Comments for discussion</b> |

Decision on nb of interventions

Decision on level of registration

Decision on nb of interventions

|  |
|--|
|  |
|  |

i 7 chest drain 8 electric stimulation of the heart (includes defibrillation, pacing etc) 9 cardiac massage 10 tracheostomy 11 other  
ardiac arrest and CPR

Decision on nb of interventions

|  |
|--|
|  |
|--|



|  |
|--|
|  |
|  |
|  |

|                            |
|----------------------------|
|                            |
| atment and transport (TBD) |
|                            |
|                            |
|                            |

in the initial (main) hospital  
mpared with tentative diagnosis)  
1277.

ceiving hospitals response on arrival (1 = inadequate; 2 = adequate; 3 = hyper-response; 4 = not evaluated)

|  |
|--|
|  |
|--|

Requires that each unit has defined the minimal standard of care in a given diagnosis

|  |
|--|
|  |
|  |

I.E: Intended intubation not possible.

|                               |
|-------------------------------|
| The Eq-5d is simple to obtain |
|                               |

call from dispatch center (urgency)  
en the availability (TBD)

|  |
|--|
|  |
|--|





ing for speciality in surgery, Other type of physician (specify)

us capnography, nose-sampling capnography, Blood-sugar measurement equipment, Pressors, Anesthetics, trombolytic drugs....++

nsfer of other patient to higher level of treatment, transfer of patient between nations for special type of care, transfer of neonatal patient in inc















incubator to higher level of care, transfer of neonatal patient in incubator to lower level of care
